# Supplementary material for: A Simple and High-Throughput Analysis of Amatoxins and Phallotoxins in Human Plasma, Serum and Urine Using UPLC-MS/MS Combined with PRiME HLB μElution Platform
Source: PubMed Central journal article supplement (PMC4885043; doi:10.3390/toxins8050128), 2016-05-04
Supplement: toxins-08-00128-s001.pdf [file toxins-08-00128-s001.pdf]

## Supplementary Materials: A Simple and High-Throughput Analysis of Amatoxins and Phallotoxins in Human Plasma, Serum and Urine Using UPLC-MS/MS Combined with PRiME HLB $\mu$ Elution

Shuo Zhang, Yunfeng Zhao, Haijiao Li, Shuang Zhou, Dawei Chen, Yizhe Zhang, Qunmei Yao and Chengye Sun

The extraction procedures for WAX, WCX, HLB and PRiME HLB cartridges in detail:

**WAX:** a WAX 1cc/30 mg cartridge was preconditioned with methanol and water, then 1 mL 10 ng/mL water-dissolved standard mixture was loaded onto the cartridge. After washing the cartridge with 1 mL 2% formic acid in water and 1 mL methanol, the analytes were eluted with 1 mL 5%  $\text{NH}_3\cdot\text{H}_2\text{O}$  in methanol. The eluent was evaporated under  $\text{N}_2$  and the residues were diluted with initial mobile phase.

**WCX:** a WCX 1cc/30 mg cartridge was preconditioned with methanol and water, then 1 mL 10 ng/mL water-dissolved standard mixture was loaded onto the cartridge. After washing the cartridge with 1 mL 2%  $\text{NH}_3\cdot\text{H}_2\text{O}$  in water and 1 mL methanol, the analytes were eluted with 1 mL 2% formic acid in methanol. The eluent was evaporated under  $\text{N}_2$  and the residues were diluted with initial mobile phase.

**HLB:** a HLB 1cc/30 mg cartridge was preconditioned with methanol and water, then 1 mL 10 ng/mL water-dissolved standard mixture was loaded onto the cartridge. After washing the cartridge with 1 mL 5% methanol in water, the analytes were eluted with 1 mL methanol. The eluent was evaporated under  $\text{N}_2$  and the residues were diluted with initial mobile phase.

**PRiME HLB:** 1 mL 10 ng/mL water-dissolved standard mixture was loaded onto the PRiME HLB cartridge. After washing the cartridge with 1 mL 5% methanol in water, the analytes were eluted with 1 mL methanol. The eluent was evaporated under  $\text{N}_2$  and the residues were diluted with initial mobile phase.

The HLB  $\mu$ Elution and PRiME HLB  $\mu$ Elution protocols:

**HLB  $\mu$ Elution:** after conditioning the HLB  $\mu$ Elution 96-well plate with 200  $\mu\text{L}$  of MeOH and water, 100  $\mu\text{L}$  of 10 ng/mL plasma QC sample and 100  $\mu\text{L}$  4%  $\text{H}_3\text{PO}_4$ -water solution mixture was transferred onto the well. The loaded plate was then washed with 200  $\mu\text{L}$  of 5% methanol in water twice and the sample was eluted with 25  $\mu\text{L}$  of methanol–water (95/5, *v/v*) twice. The eluent was diluted with 450  $\mu\text{L}$  initial mobile phase.

**PRiME HLB  $\mu$ Elution:** 100  $\mu\text{L}$  of 10 ng/mL plasma QC sample and 100  $\mu\text{L}$  4%  $\text{H}_3\text{PO}_4$ -water solution mixture was transferred onto the PRiME HLB  $\mu$ Elution 96-well plate. The loaded plate was then washed with 200  $\mu\text{L}$  of 5% methanol in water twice and the sample was eluted with 25  $\mu\text{L}$  of methanol-water (95/5, *v/v*) twice. The eluent was diluted with 450  $\mu\text{L}$  initial mobile phase.

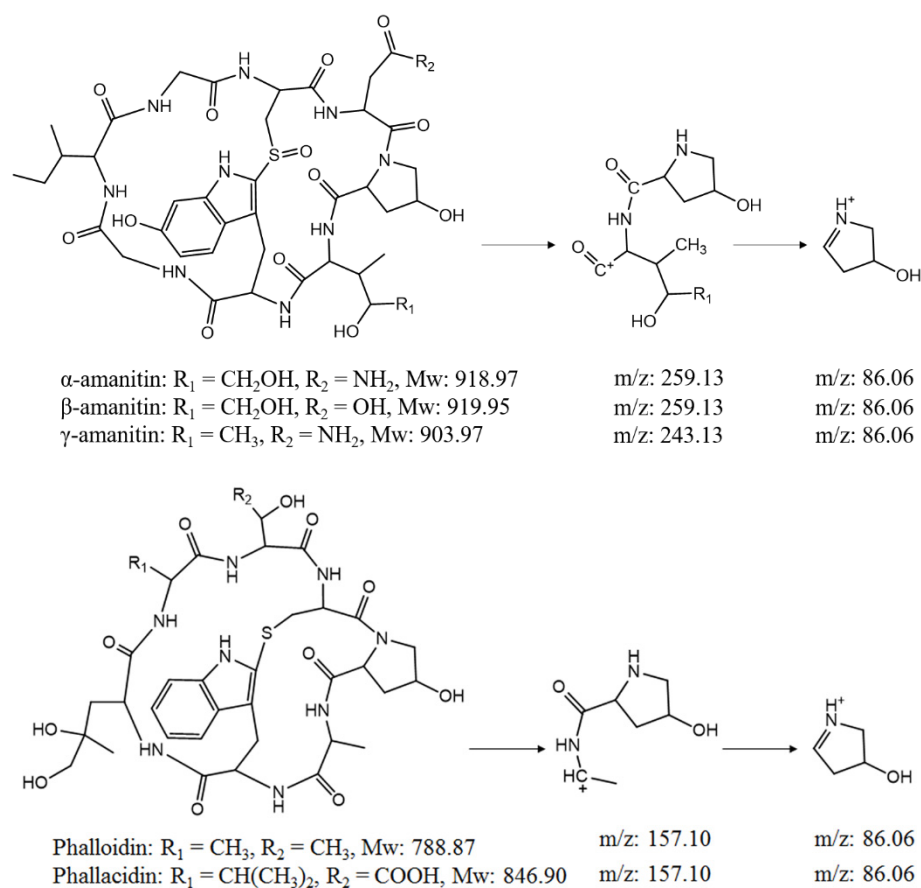

**Figure S1.** The proposed fragmentation of the analytes by MS/MS mode to their products

**Table S1.** The information of 24 urine samples with mushroom poisoning

| Case | Gender | Age (year) | Time post ingestion (h) | Symptom                                               | Intoxicated mushroom                                     | Toxins analysis | Sample |
|------|--------|------------|-------------------------|-------------------------------------------------------|----------------------------------------------------------|-----------------|--------|
| 1    | F      | 38         | 74.5                    | Nausea, vomiting, abdominal pain, and watery diarrhea | Unknown                                                  | ND              | 1      |
| 2    | F      | 57         | 72                      | Nausea, vomiting, diarrhea and palpitation            | Unknown                                                  | ND              | 2      |
| 3    | M      | 61         | 80                      |                                                       |                                                          | ND              | 3      |
| 3    | M      | 61         | 96                      | Nausea, vomiting and diarrhea                         | Unknown                                                  | ND              | 4      |
| 3    | M      | 61         | 116                     |                                                       |                                                          | ND              | 5      |
| 4    | M      | 48         | 48                      | Abdominal pain, muscular pain                         | <i>Russula nigricans</i> and <i>Russula griseocarnea</i> | ND              | 6      |
| 4    | M      | 48         | 72                      |                                                       |                                                          | ND              | 7      |
| 7    | M      | 52         | Unknown                 | Nausea, vomiting and diarrhea                         | Unknown                                                  | ND              | 8      |
| 8    | F      | 51         | Unknown                 | Nausea, vomiting and diarrhea                         | Unknown                                                  | ND              | 9      |
| 9    | M      | 70         | 96.5                    | Nausea, vomiting and palpitation                      | Unknown                                                  | ND              | 10     |
| 10   | M      | 55         | 102                     | Nausea, vomiting and palpitation                      | Unknown                                                  | ND              | 11     |

Table S1. Cont.

|    |   |    |         |                                               |                          |    |    |
|----|---|----|---------|-----------------------------------------------|--------------------------|----|----|
| 11 | F | 59 | 144     | Nausea, vomiting and skin rash                | Unknown                  | ND | 12 |
| 12 | M | 12 | 96      | Vomiting, abdominal pain, and watery diarrhea | Unknown                  | ND | 13 |
| 13 | M | 36 | 96      | Vomiting, abdominal pain, and watery diarrhea | Unknown                  | ND | 14 |
| 14 | M | 35 | Unknown | Dizziness, nausea and diarrhea                | Unknown                  | ND | 15 |
| 15 | M | 43 | 72      | Vomiting and diarrhea                         | Unknown                  | ND | 16 |
| 16 | M | 11 | 74      | Vomiting and diarrhea                         | Unknown                  | ND | 17 |
| 17 | M | 59 | 77      | Vomiting and diarrhea                         | Unknown                  | ND | 18 |
| 18 | M | 49 | 74      | Nausea, vomiting and diarrhea                 | <i>Amanita exitialis</i> | +  | 19 |
| 19 | M | 59 | 74      | Nausea, vomiting and diarrhea                 | <i>Amanita exitialis</i> | +  | 20 |
| 20 | F | 44 | 72      | Diarrhea and palpitation                      | Unknown                  | ND | 21 |
|    |   |    | 80      |                                               |                          | ND | 22 |
| 21 | M | 34 | 192     | Nausea and diarrhea                           | Unknown                  | ND | 23 |
| 22 | F | 53 | 72      | Nausea and diarrhea                           | <i>Russula virescens</i> | ND | 24 |

M: male; F: female; ND: not detected (< LOD); +: positive.
